# Supplementary material for: Effect of synthesis pH on the structure and catalytic properties of FeMo catalysts
Source: Royal Society of Chemistry journal article supplement (doi:10.1039/c9ra07202k), 2019-01-01
Supplement: c9ra07202k1.pdf [file c9ra07202k1.pdf]

## **Electronic Supplementary Information**

Effect of synthesis pH on the structure and catalytic properties  
of FeMo catalysts

Shuai Zhang and Minghan Han<sup>□</sup>

Department of Chemical Engineering, Tsinghua University, Beijing 100084, China

## Figures

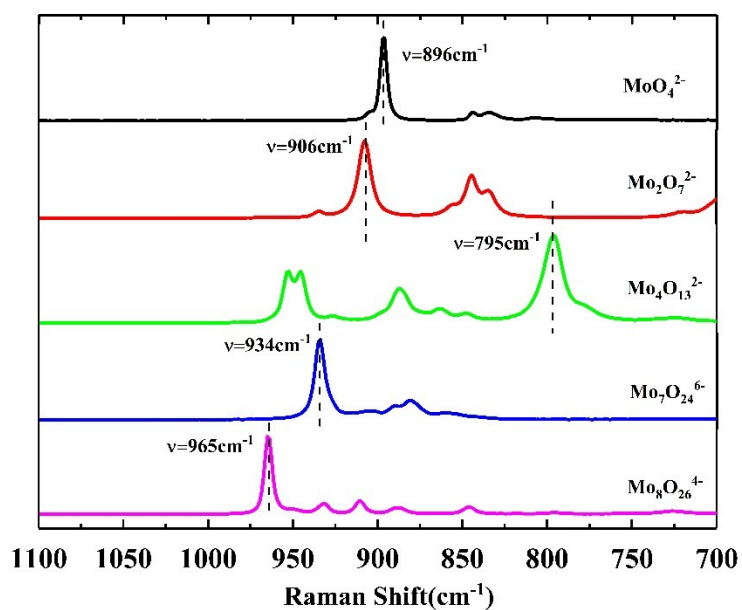

Fig. S1. Raman spectra of different pure solid isopolymolybdates.

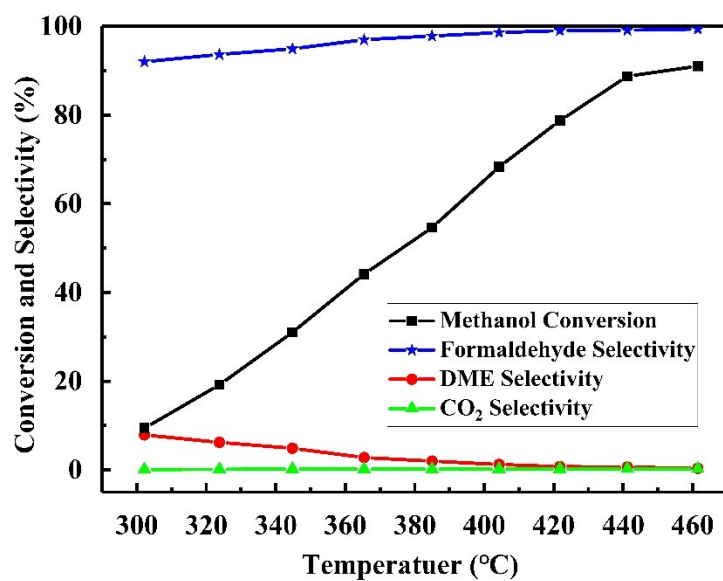

Fig. S2. The activity and selectivity test of  $\text{MoO}_3$ .
